# Supplementary material
Source: publisher figshare collection journal article supplement (https://sage.figshare.com/ndownloader/files/14949293)
Supplement: Supplementary file 1 [file 14949293]

## Sheet: study 1
		1	2	3	4	5	6	7	8	9	10	11	12	13	14	15	16	17	18	19	20	21	22	23
	TIRT
1	Extraversion
2	Agreeableness	0.334
3	Conscientiousness	0.09	0.132
4	Emotional Stability	0.0161898	0.473	0.635
5	Openness	0.356	0.416	-0.062	0.041
	Ipsative
6	Extraversion	0.983	0.357	0.13	0.034	0.417
7	Agreeableness	0.282	0.967	0.0188296	0.378	0.38	0.312
8	Conscientiousness	0.06	-0.0214134	0.952	0.547	-0.179	0.096	-0.115
9	Emotional Stability	-0.075	0.403	0.549	0.958	-0.09	-0.07	0.329	0.477
10	Openness	0.434	0.315	-0.00705874	0.03	0.911	0.502	0.279	-0.09	-0.12
	BFI-10
11	Extraversion	0.715	0.256	0.043	0.0122101	0.238	0.701	0.221	0.0188507	-0.052	0.284
12	Agreeableness	0.117	0.355	0.134	0.286	0.106	0.128	0.341	0.063	0.272	0.057	0.129
13	Conscientiousness	0.164	0.148	0.429	0.268	0.103	0.203	0.096	0.398	0.194	0.134	0.138	0.171
14	Emotional Stability	0.302	0.147	0.265	0.376	0.078	0.291	0.089	0.253	0.343	0.13	0.3	0.114	0.191
15	Openness	0.124	0.16	-0.097	-0.042	0.498	0.158	0.15	-0.153	-0.094	0.456	0.066	0.031	0.062	-0.00306568
	Other
16	SLSS	0.171	0.223	0.212	0.263	0.0200998	0.171	0.199	0.183	0.237	0.0295008	0.153	0.202	0.231	0.225	-0.0163054
17	Participation	0.047	0.00688576	0.00288552	-0.0155153	-0.00528042	0.046	0.0066881	0.00833826	-0.0169382	-0.00395461	0.038	0.0175482	0.0167471	0.0125664	-0.0212092	0.018866
18	GPA	0.0224581	0.068	0.17	0.072	0.000407577	0.032	0.047	0.164	0.038	0.05	-0.00194337	-0.032	0.148	-0.0030904	0.033	0.136	0.045
19	ACT Composite	-0.0151308	0.00412441	0.068	-0.00635104	0.0202107	-0.0154825	-0.0200077	0.098	-0.048	0.087	-0.054	-0.225	0.079	0.052	0.13	0.073	0.048	0.428
20	ACT English	-0.0130149	0.0131297	0.044	-0.0268701	0.046	-0.0119867	-0.0120828	0.066	-0.066	0.1	-0.057	-0.215	0.082	0.0109595	0.159	0.07	0.055	0.408	0.924
21	ACT Reading	-0.0118932	-0.00214296	0.032	-0.045	0.035	-0.0125742	-0.0230484	0.057	-0.079	0.096	-0.05	-0.234	0.06	0.0153753	0.144	0.04	0.041	0.357	0.894	0.804
22	ACT Mathematics	-0.0112855	6.06476e-05	0.098	0.041	-0.0227924	-0.0128625	-0.0219624	0.133	0.002217	0.043	-0.038	-0.172	0.079	0.099	0.059	0.083	0.035	0.404	0.874	0.747	0.654
23	ACT Science	-0.0162659	0.00692238	0.077	0.0177578	0.00762949	-0.0175784	-0.0123361	0.107	-0.0191168	0.067	-0.047	-0.177	0.061	0.062	0.086	0.072	0.039	0.368	0.895	0.752	0.725	0.774

## Sheet: study 2
		1	2	3	4	5	6	7	8	9	10	11	12	13	14	15	16	17	18	19	20	21	22
	TIRT
1	Extraversion
2	Agreeablness	0.723
3	Grit	0.557	0.745
4	Responsibility	0.68	0.709	0.917
5	Emotional Stability	0.691	0.463	0.732	0.634
6	Openness	0.347	0.482	0.356	0.25	0.218
	Ipsative
7	Extraversion	0.923	0.632	0.387	0.52	0.531	0.403
8	Agreeablness	0.444	0.809	0.433	0.358	0.171	0.48	0.375
9	Grit	0.555	0.648	0.873	0.797	0.7	0.332	0.466	0.262
10	Responsibility	0.419	0.434	0.625	0.77	0.337	-0.00272443	0.261	0.227	0.499
11	Emotional Stability	0.476	0.334	0.667	0.544	0.871	0.184	0.302	0.178	0.516	0.334
12	Openness	0.385	0.419	0.289	0.229	0.224	0.926	0.452	0.443	0.258	0.0235997	0.2
	BFI-2
13	Extraversion	0.619	0.44	0.299	0.354	0.429	0.207	0.632	0.27	0.35	0.121	0.22	0.254
14	Agreeableness	0.162	0.44	0.329	0.243	0.135	0.191	0.103566	0.449	0.205	0.194	0.209	0.175	0.165
15	Conscientiousness	0.421	0.459	0.66	0.727	0.418	0.117	0.306	0.21	0.547	0.593	0.371	0.0989427	0.298	0.246
16	Emotional Stability	0.33	0.246	0.384	0.314	0.512	0.158	0.26	0.172	0.325	0.184	0.526	0.203	0.391	0.198	0.286
17	Openness	0.311	0.352	0.298	0.258	0.204	0.648	0.352	0.291	0.319	0.0805448	0.161	0.611	0.231	0.214	0.219	0.0760599
	Other
18	SWLS	0.357	0.302	0.325	0.335	0.336	0.105603	0.314	0.16	0.37	0.263	0.264	0.091067	0.382	0.104504	0.26	0.434	0.0768507
19	CAT Internalizing	-0.419	-0.299	-0.376	-0.342	-0.513	-0.152	-0.367	-0.2	-0.361	-0.208	-0.458	-0.205	-0.484	-0.221	-0.3	-0.82	-0.0708024	-0.492
20	CAT Externalizing	-0.109	-0.349	-0.326	-0.295	-0.0889067	-0.0955877	0.0100028	-0.332	-0.178	-0.334	-0.17	-0.0598592	-0.0294253	-0.527	-0.347	-0.121	-0.177	-0.134	0.204
21	CSB	-0.0426459	-0.259	-0.275	-0.252	-0.0251688	-0.144	0.00608609	-0.241	-0.181	-0.255	-0.0806456	-0.116	0.0824304	-0.324	-0.239	-0.00273647	-0.197	0.0205272	0.0351117	0.414
22	GPA	0.0924604	0.115	0.215	0.249	0.105765	-0.038409	0.0140712	-0.0156363	0.22	0.211	0.109	-0.0340393	0.0437519	0.00858145	0.163	0.0172095	0.0413313	0.202	0.00525273	-0.157	-0.0477637

## Sheet: study 3
		1	2	3	4	5	6	7	8	9	10	11	12	13	14	15	16	17	18	19	20	21	22	23	24
	TIRT
1	Honesty
2	Emotionality	0.346
3	Extraversion	-0.299	0.715
4	Agreeableness	0.789	0.74	0.264
5	Conscientiousness	0.795	0.776	0.237	0.901
6	Openness	0.73	0.418	0.171	0.827	0.714
	Ipsative
7	Honesty	0.757	0.533	0.078	0.66	0.676	0.569
8	Emotionality	0.471	0.754	0.363	0.65	0.674	0.41	0.545
9	Extraversion	-0.076	0.775	0.945	0.448	0.424	0.371	0.256	0.402
10	Agreeableness	0.557	0.392	0.0288174	0.746	0.549	0.561	0.359	0.238	0.175
11	Conscientiousness	0.737	0.437	-0.083	0.641	0.829	0.54	0.558	0.448	0.118	0.435
12	Openness	0.171	0.209	0.401	0.411	0.251	0.736	0.146	0.195	0.486	0.261	0.087
	SS
13	Honesty	0.442	0.177	-0.107	0.366	0.334	0.314	0.42	0.176	-0.00825091	0.345	0.303	0.082
14	Emotionality	-0.0555703	0.167	0.182	0.00955444	0.0581207	-0.00314993	-0.030299	0.32	0.138	-0.186	-0.0145899	0.126	-0.176
15	Extraversion	0.0512869	0.671	0.693	0.446	0.428	0.335	0.24	0.464	0.722	0.197	0.164	0.335	0.0586507	0.169
16	Agreeableness	0.43	0.372	0.125	0.532	0.471	0.451	0.401	0.295	0.227	0.451	0.343	0.205	0.596	-0.172	0.348
17	Conscientiousness	0.491	0.349	0.0174087	0.474	0.562	0.402	0.399	0.301	0.148	0.336	0.571	0.086	0.432	-0.18	0.251	0.586
18	Openness	0.178	0.158	0.213	0.295	0.237	0.483	0.135	0.144	0.283	0.176	0.16	0.552	0.28	0.074	0.366	0.43	0.408
	BFI-10
19	Extraversion	-0.101	0.626	0.787	0.332	0.312	0.271	0.192	0.36	0.795	0.0643386	0.0463253	0.385	-0.0432853	0.16	0.753	0.181	0.076	0.234
20	Agreeableness	0.374	0.397	0.15	0.512	0.416	0.358	0.363	0.311	0.233	0.461	0.254	0.133	0.365	0.004267	0.352	0.465	0.271	0.162	0.198
21	Conscientiousness	0.512	0.482	0.124	0.529	0.666	0.429	0.472	0.449	0.26	0.308	0.647	0.121	0.333	0.0640847	0.317	0.436	0.614	0.281	0.224	0.299
22	Emotional Stability	0.263	0.594	0.388	0.459	0.474	0.302	0.345	0.642	0.412	0.135	0.262	0.212	0.154	0.425	0.513	0.272	0.211	0.19	0.428	0.338	0.378
23	Openness	0.127	0.0407106	0.133	0.207	0.119	0.407	0.089	0.0137003	0.198	0.133	0.0603369	0.481	0.132	-0.0184202	0.124	0.221	0.167	0.585	0.164	0.116	0.159	0.096
	Other
24	Education level	-0.00610492	0.095	0.13	0.0624818	0.0664031	0.081	0.0243071	0.09	0.116	0.0141245	0.00617443	0.111	-0.0162946	0.0331935	0.125	0.0142109	-0.00904498	0.082	0.138	-0.000913668	0.0187922	0.0603116	0.0278038
